# Supplementary material for: Contribution of Different Food Types to Vitamin A Intake in the Chinese Diet
Source: MDPI journal article supplement (doi:10.3390/nu15184028), 2023-09-17
Supplement: s1 [file s1]

# Contribution of Different Food Types to Vitamin A Intake in the Chinese Diet

Xue Li <sup>1,2</sup>, Can Guo <sup>1,2</sup>, Yu Zhang <sup>1,2</sup>, Li Yu <sup>1,2</sup>, Fei Ma <sup>1,2</sup>, Xuefang Wang <sup>1,2</sup>, Liangxiao Zhang <sup>1,2,3,4,\*</sup> and Peiwu Li <sup>1,2,3,4,5</sup>

- <sup>1</sup> Key Laboratory of Biology and Genetic Improvement of Oil Crops, Ministry of Agriculture and Rural Affairs, Oil Crops Research Institute, Chinese Academy of Agricultural Sciences, Wuhan 430062, China; 15071198582@163.com (X.L.); guocan2020@163.com (C.G.); 15110662878@163.com (Y.Z.); yuli01@caas.cn (L.Y.); mafei01@caas.cn (F.M.); wangxuefang01@caas.cn (X.W.); peiwuli@oilcrops.cn (P.L.)
  - <sup>2</sup> Quality Inspection and Test Center for Oilseed Products, Ministry of Agriculture and Rural Affairs, Oil Crops Research Institute, Chinese Academy of Agricultural Sciences, Wuhan 430062, China
  - <sup>3</sup> College of Food Science and Engineering, Collaborative Innovation Center for Modern Grain Circulation and Safety, Nanjing University of Finance and Economics, Nanjing 210023, China
  - <sup>4</sup> Hubei Hongshan Laboratory, Wuhan 430070, China
  - <sup>5</sup> Xianghu Laboratory, Hangzhou 311231, China
- \* Correspondence: zhanglx@caas.cn; Tel.: +86-27-86812862; Fax: +86-27-86812862

## **Supplementary materials**

Table S1 Vitamin A content of main foods

Table S2 The amount of vegetables for recommended nutrient intake of vitamin A by replacing all vegetables

Table S3 The amount of vegetables for recommended nutrient intake of vitamin A

**Table S1** Vitamin A content of main foods

| Food Categories | Foods             | Vitamin A content<br>(ugRAE)/100g |
|-----------------|-------------------|-----------------------------------|
| Coarse cereals  | Soba flour        | 2                                 |
|                 | Oat flour         | 2                                 |
| Potato          | Potato            | 1                                 |
|                 | Sweet potato      | 18                                |
| Bean            | Soybean           | 18                                |
|                 | Mung bean         | 11                                |
|                 | Red bean          | 7                                 |
| Vegetable       | Carrot            | 342                               |
|                 | Kidney bean       | 18                                |
|                 | Cowpea            | 10                                |
|                 | Eggplant          | 4                                 |
|                 | Tomato            | 31                                |
|                 | Red pepper        | 116                               |
|                 | Green pepper      | 8                                 |
|                 | Sweet pepper      | 6                                 |
|                 | Cucumber          | 8                                 |
|                 | Pumpkin           | 74                                |
|                 | Chinese chives    | 133                               |
|                 | Cabbage           | 6                                 |
|                 | Broccoli          | 13                                |
|                 | Spinach           | 243                               |
|                 | Asparagus lettuce | 13                                |
|                 | Lettuce           | 63                                |
| Fruits          | Apple             | 4                                 |
|                 | Banana            | 3                                 |
|                 | Pear              | 2                                 |
|                 | Grape             | 3                                 |
|                 | Peach             | 2                                 |

|                  |                       |     |
|------------------|-----------------------|-----|
|                  | Tangerine             | 15  |
|                  | Orange                | 13  |
|                  | Grapefruit            | 24  |
|                  | Cherry                | 18  |
| Meats            | Beef                  | 3   |
|                  | Chicken               | 92  |
|                  | Pork                  | 15  |
|                  | Mutton                | 8   |
| Eggs             | Egg                   | 255 |
|                  | Duck egg              | 261 |
|                  | Goose egg             | 192 |
|                  | Quail egg             | 337 |
| Milk             | Milk                  | 54  |
|                  | Whole milk powder     | 380 |
| Aquatic Products | Fish                  | 53  |
|                  | Shrimp and Crab diver | 488 |
|                  | Shellfish             | 50  |
|                  | Algae                 | -   |

**Table S2** The amount of vegetables for recommended nutrient intake of vitamin A by replacing all vegetables

| <b>Vegetables</b> | <b>Vitamin A content<br/>(ugRAE)-100g</b> | <b>The amount of vegetables<br/>for women (g)</b> | <b>The amount of vegetables<br/>for men (g)</b> |
|-------------------|-------------------------------------------|---------------------------------------------------|-------------------------------------------------|
| Carrot            | 342                                       | 144                                               | 173                                             |
| Kidney bean       | 18                                        | 2736                                              | 3292                                            |
| Cowpea            | 10                                        | 4925                                              | 5925                                            |
| Eggplant          | 4                                         | 12312                                             | 14812                                           |
| Tomato            | 31                                        | 1589                                              | 1911                                            |
| Red pepper        | 116                                       | 425                                               | 511                                             |
| Green pepper      | 8                                         | 6156                                              | 7406                                            |
| Sweet pepper      | 6                                         | 8208                                              | 9875                                            |
| Cucumber          | 8                                         | 6156                                              | 7406                                            |
| Pumpkin           | 74                                        | 666                                               | 936                                             |
| Chinese chives    | 133                                       | 370                                               | 445                                             |
| Cabbage           | 6                                         | 8208                                              | 9875                                            |
| Broccoli          | 13                                        | 3788                                              | 4557                                            |
| Spinach           | 243                                       | 203                                               | 244                                             |
| Asparagus lettuce | 13                                        | 3788                                              | 4577                                            |
| Lettuce           | 63                                        | 782                                               | 940                                             |

**Table S3** The amount of vegetables for recommended nutrient intake of vitamin A

| <b>Vegetables</b> | <b>Vitamin A content<br/>(ugRAE)-100g</b> | <b>Recommended vitamin A<br/>intake (ugRAE) for<br/>women/men</b> | <b>The amount of vegetables<br/>for women/ men (g)</b> |
|-------------------|-------------------------------------------|-------------------------------------------------------------------|--------------------------------------------------------|
| Carrot            | 342                                       | 342.92/442.92                                                     | 100/130                                                |
| Kidney bean       | 18                                        | 240.78/340.78                                                     | 1338/1893                                              |
| Cowpea            | 10                                        | 239.51/339.51                                                     | 2395/3395                                              |
| Eggplant          | 4                                         | 240.67/340.67                                                     | 6017/8517                                              |
| Tomato            | 31                                        | 251.50/351.50                                                     | 811/1134                                               |
| Red pepper        | 116                                       |                                                                   |                                                        |
| Green pepper      | 8                                         | 258.44/358.44                                                     | 199/276                                                |
| Sweet pepper      | 6                                         |                                                                   |                                                        |
| Cucumber          | 8                                         | 242.53/342.53                                                     | 3031/4282                                              |
| Pumpkin           | 74                                        | 248.47/348.47                                                     | 336/471                                                |
| Chinese chives    | 133                                       | 241.45/341.45                                                     | 182/257                                                |
| Cabbage           | 6                                         | 240.82/340.82                                                     | 4014/5680                                              |
| Broccoli          | 13                                        | 241.14/341.14                                                     | 1855/2624                                              |
| Spinach           | 243                                       | 306.27/406.27                                                     | 126/167                                                |
| Asparagus lettuce | 13                                        | 251.27/351.27                                                     | 331/462                                                |
| Lettuce           | 63                                        |                                                                   |                                                        |
